# Supplementary material for: West Nile Virus Mosquito Vectors (Diptera: Culicidae) in Germany
Source: PubMed Central journal article supplement (PMC7290393; doi:10.3390/v12050493), 2020-04-28
Supplement: viruses-12-00493-s001.pdf [file viruses-12-00493-s001.pdf]

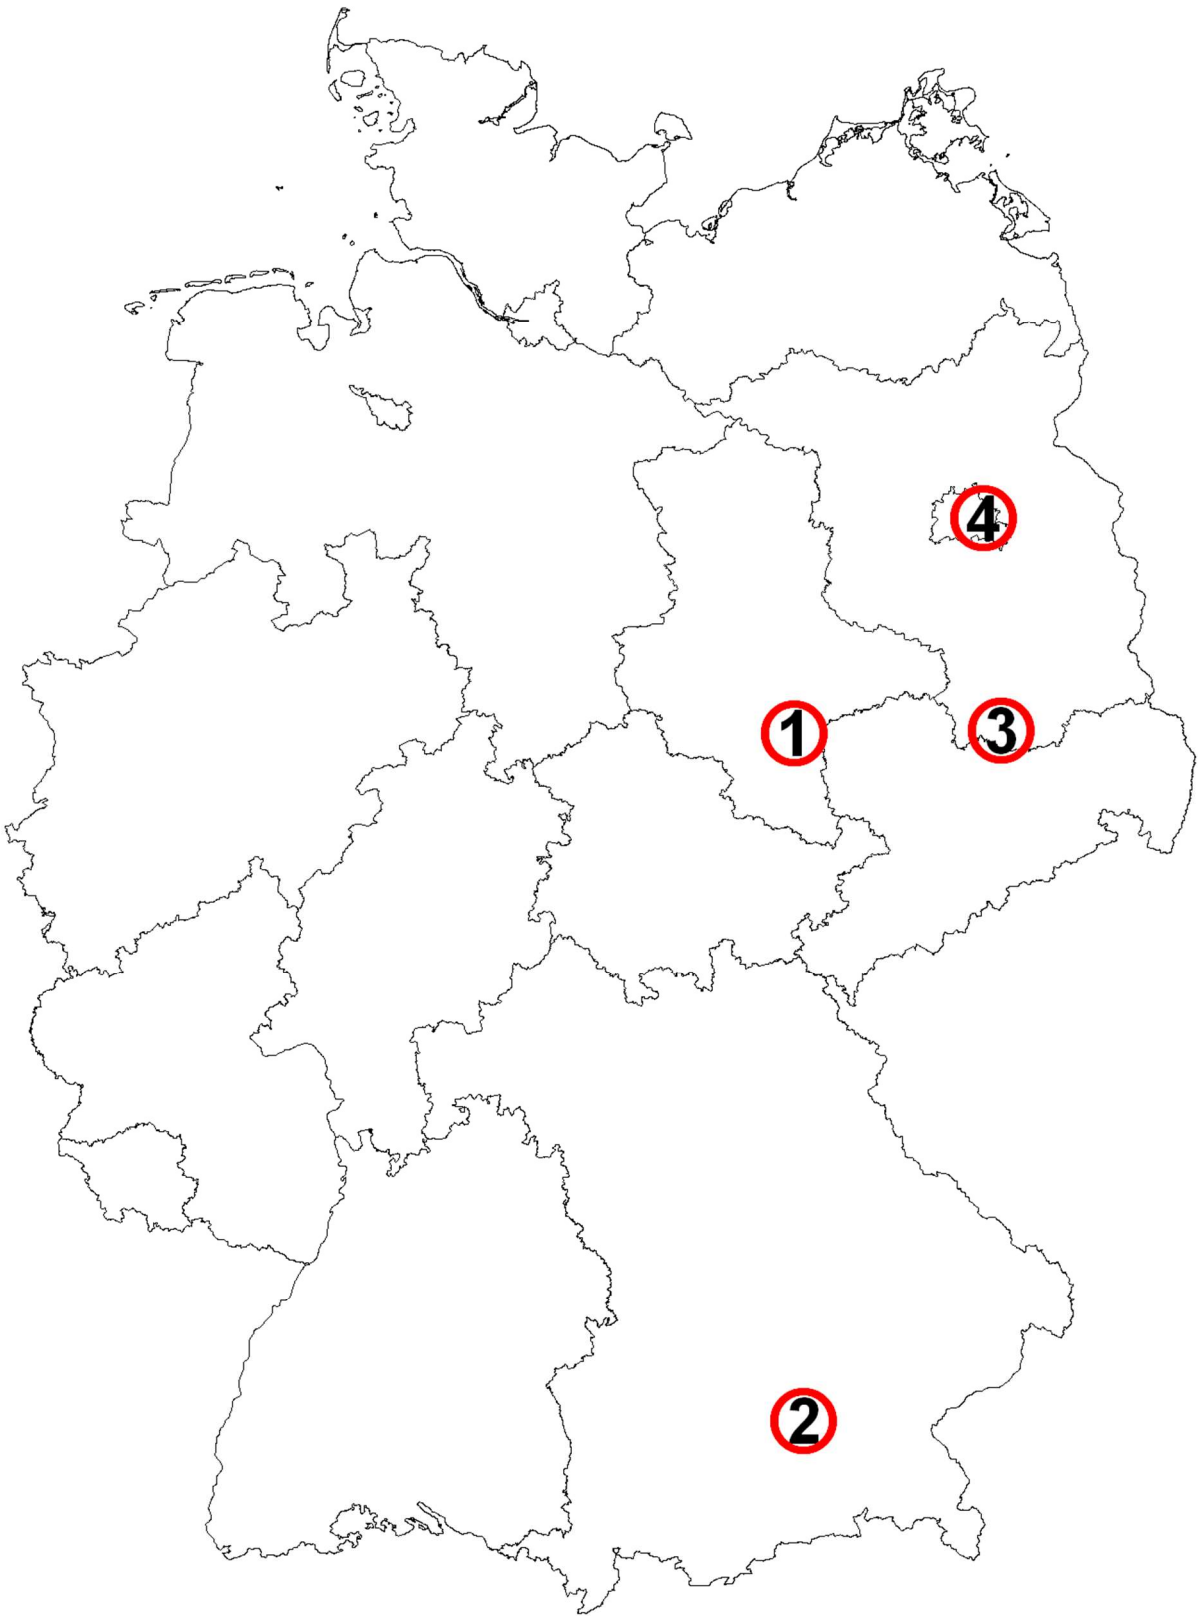

**Figure S1.** Geographic locations of sampling sites in 2018 and 2019 with mosquitoes screened for WNV (1: Zoo Halle, 2: Wildlife Park Poing, 3: horse pasture Kahla, 4: Tierpark Berlin)

**Table S1.** Geocoordinates of mosquito trapping sites.

| <b>Location</b>          | <b>No. according to Figure S1</b> | <b>Year</b> | <b>Trap type</b> | <b>Geocoordinates of trapping sites</b>                                                                                                                                                                                                                                                                                                                                                                              |
|--------------------------|-----------------------------------|-------------|------------------|----------------------------------------------------------------------------------------------------------------------------------------------------------------------------------------------------------------------------------------------------------------------------------------------------------------------------------------------------------------------------------------------------------------------|
| Halle<br>(Zoo)           | 1                                 | 2018        | EVS              | 51.505318, 11.963355<br>51.504670, 11.962963<br>51.504654, 11.961558<br>51.505098, 11.960785<br>51.505679, 11.961032<br>51.506033, 11.961317<br>51.506260, 11.962287<br>51.505531, 11.962003<br>51.504857, 11.961907<br>51.505378, 11.963216                                                                                                                                                                         |
| Poing<br>(Wildlife Park) | 2                                 | 2018        | EVS              | 48.174844, 11.831776<br>48.173813, 11.831669<br>48.174579, 11.832892<br>48.174343, 11.833793<br>48.174064, 11.835070<br>48.174529, 11.837409<br>48.172561, 11.835725<br>48.172533, 11.833718<br>48.172340, 11.837388<br>48.172526, 11.829255                                                                                                                                                                         |
| Kahla<br>(horse pasture) | 3                                 | 2018        | EVS              | 51.463674, 13.562991<br>51.463587, 13.563602<br>51.463448, 13.564369<br>51.463368, 13.564884<br>51.463050, 13.564889<br>51.469494, 13.559809<br>51.469381, 13.560372<br>51.469264, 13.561175<br>51.469204, 13.562078<br>51.469187, 13.563033                                                                                                                                                                         |
| Berlin<br>(Tierpark)     | 4                                 | 2018, 2019  | EVS              | 52.497853, 13.530766<br>52.499250, 13.535497<br>52.499766, 13.540551<br>52.501758, 13.536366<br>52.503652, 13.535234<br>52.502777, 13.535733<br>52.502568, 13.531656<br>52.504541, 13.534102<br>52.504201, 13.533180<br>52.504305, 13.531774<br>52.507930, 13.528534<br>52.506114, 13.531528<br>52.507571, 13.526442<br>52.507353, 13.535827<br>52.504901, 13.534408<br>52.505744, 13.534108<br>52.507216, 13.533260 |

|  |      |    |                      |
|--|------|----|----------------------|
|  |      |    | 52.508238, 13.533191 |
|  |      |    | 52.502738, 13.525686 |
|  |      |    | 52.498075, 13.526565 |
|  | 2019 | BG | 52.506565, 13.531903 |

**Table S2.** Primers used for amplification and sequencing of the E gene.

| <b>Primer</b> | <b>Sequence (5'-3')</b> | <b>Reference</b> |
|---------------|-------------------------|------------------|
| R1300         | TTGGCGCATGTGTCAATGCT    | [1]              |
| BT1224        | GCCTGCCAATATCAATGGCAC   | this study       |
| BT1225        | TGACCGTGAATCCATTTGTGTC  | this study       |
| BT1226        | ACGGGGGTTTCGAGTTCAATC   | this study       |
| BT1227        | CCACGTGGAGGAATCGGG      | this study       |
| BT1228        | TCCTGCGACCCTAGAGCC      | this study       |
| BT1229        | AGAGGATGGGGAAATGGCTG    | this study       |
| BT1230        | AGGAAGCAACACAATGCAACGC  | this study       |

## References

1. Grinev, A.; Daniel, S.; Stramer, S.; Rossmann, S.; Caglioti, S.; Rios, M. Genetic variability of West Nile virus in US blood donors, 2002-2005. *Emerg. Infect. Dis.* **2008**, *14*, 436–444.
